# Supplementary material for: Plant Species Richness and Invasional Meltdown in Different Parts of Acer negundo L. Secondary Range
Source: MDPI journal article supplement (doi:10.3390/f14112118), 2023-10-24
Supplement: s1 [file s1]

## Supplementary file S1

Here, we present the results of Generalized Linear Model analysis (GLM): dependent variables are the logarithm transformed values of species richness or arcsine transformed alien species proportion; continual factor – arcsine transformed proportion of trunks of *A. negundo* (trunk proportion); categorical factor – region (Middle Urals or Belarusian Polesia). Graphical information with non-transformed values of variables are shown below the Table.

These materials demonstrate, that, in common, our basic results are reliable and identified by both a pairwise analysis and an invasive species abundance gradient analysis.

**Table S1.** FDR-adjusted *p*-values of the effects of *Acer negundo* trunk proportion and region on species richness parameters in Generalized Linear Model analysis. Significant levels of *p*-values appear in bold.

| Species number or proportion                      | Variability source                   |                                                  |                                               |
|---------------------------------------------------|--------------------------------------|--------------------------------------------------|-----------------------------------------------|
|                                                   | trunk proportion<br>( <i>df</i> = 1) | region<br>(Urals or Polesia)<br>( <i>df</i> = 1) | trunk proportion ×<br>region ( <i>df</i> = 1) |
| Species number per 400 m <sup>2</sup> :           |                                      |                                                  |                                               |
| Total                                             | 0,0517                               | 0,1883                                           | 0,5555                                        |
| Woody                                             | <b>0,0137</b>                        | <b>0,0196</b>                                    | <b>0,0225</b>                                 |
| Herbal                                            | 0,2244                               | 0,3148                                           | 0,8579                                        |
| Native species number<br>per 400 m <sup>2</sup> : |                                      |                                                  |                                               |
| Total                                             | <b>0,0197</b>                        | 0,8908                                           | 0,8908                                        |
| Woody                                             | <b>0,0019</b>                        | <b>0,0015</b>                                    | 0,1029                                        |
| Herbal                                            | 0,0506                               | 0,8561                                           | 0,8561                                        |
| Alien species number<br>per 400 m <sup>2</sup> :  |                                      |                                                  |                                               |
| Total                                             | 0,3451                               | 0,2499                                           | 0,2499                                        |
| Woody                                             | 0,7540                               | 0,4565                                           | <b>0,0477</b>                                 |
| Herbal                                            | 0,3771                               | <b>0,0078</b>                                    | 0,6054                                        |
| Alien species proportion, %:                      |                                      |                                                  |                                               |
| Total                                             | 0,1511                               | 0,4656                                           | 0,1927                                        |
| Woody                                             | 0,5870                               | 0,2194                                           | 0,2194                                        |
| Herbal                                            | <b>0,0163</b>                        | <b>0,0039</b>                                    | 0,6198                                        |

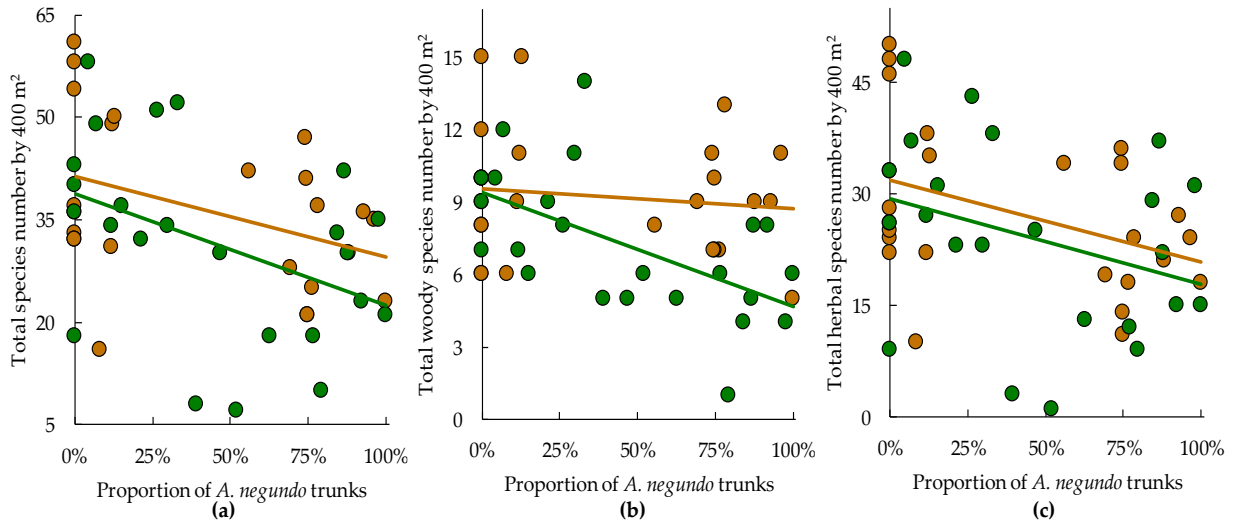

**Figure S1.** Relationship between total (a), woody (b) and herbal (c) species numbers and proportions of trunks of *A. negundo* in descriptions of Belarusian Polesia (brown circles and lines) and the Middle Urals (green circles and lines). Linear approximations for different regions are shown.

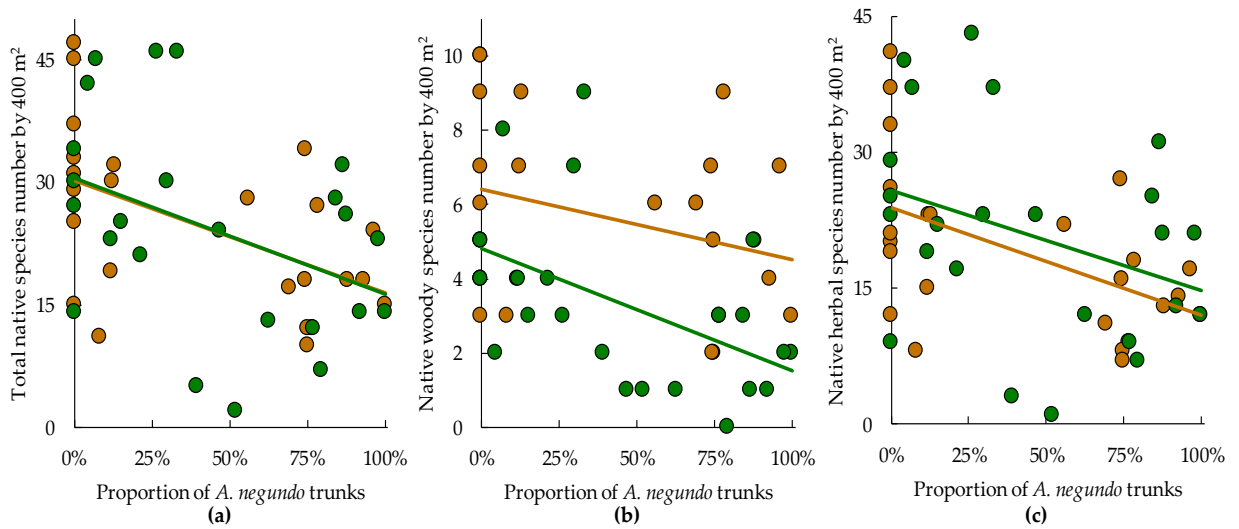

**Figure S2.** Relationship between total (a), woody (b) and herbal (c) native species numbers and proportions of trunks of *A. negundo* in descriptions of Belarusian Polesia (brown circles and lines) and the Middle Urals (green circles and lines). Linear approximations for different regions are shown.

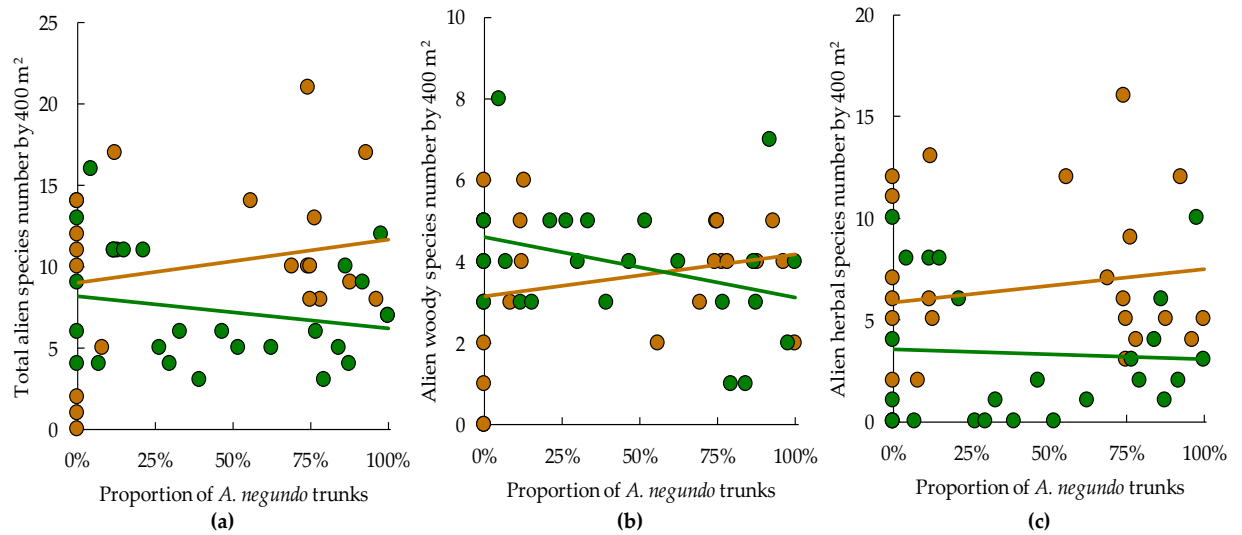

**Figure S3.** Relationship between total (a), woody (b) and herbal (c) alien species numbers and proportions of trunks of *A. negundo* in descriptions of Belarusian Polesia (brown circles and lines) and the Middle Urals (green circles and lines). Linear approximations for different regions are shown.

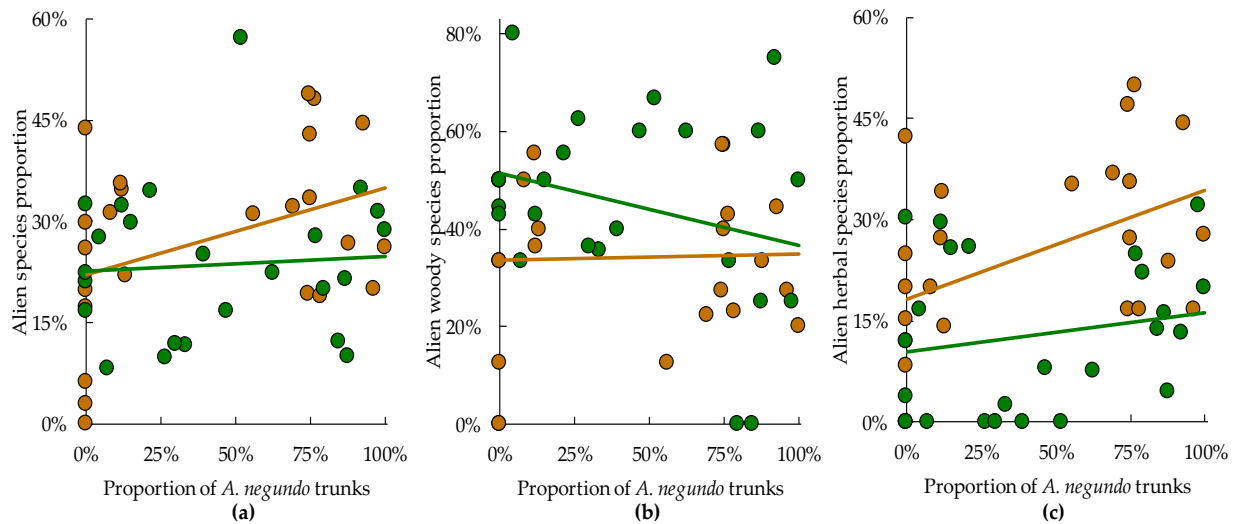

**Figure S4.** Relationship between total (a), woody (b) and herbal (c) alien species proportions and proportions of trunks of *A. negundo* in descriptions of Belarusian Polesia (brown circles and lines) and the Middle Urals (green circles and lines). Linear approximations for different regions are shown.
